# Supplementary material for: Concentration and temperature induced dual-responsive wormlike micelle to hydrogel transition in ionic liquid-type surfactant [C16imC9]Br aqueous solution without additives
Source: Royal Society of Chemistry journal article supplement (doi:10.1039/c5sm01084e), 2015-01-01
Supplement: c5sm01084e1.pdf [file c5sm01084e1.pdf]

## Concentration and thermo dual-responsive between wormlike micelle and hydrogels transition in $[C_{16}imC_9]Br$ aqueous solution without additives

Yimin Hu, Lingling Ge, Jie Han\* and Rong Guo\*

### Supporting information

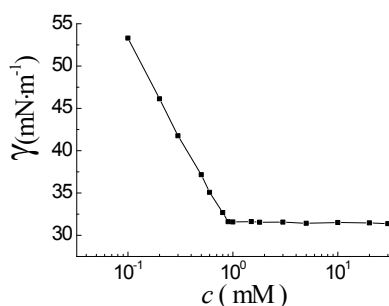

Fig.S1 Surface tension isotherms of  $[C_{16}imC_9]Br$  surfactant. The error of surface tension value is  $\pm 0.2$  mN/m.

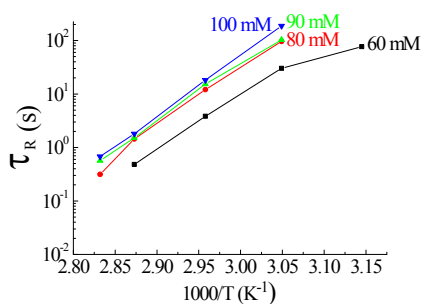

Fig. S2 Arrhenius dependence of the main relaxation time ( $\tau_R = 1/\omega_c$ ) of different  $[C_{16}imC_9]Br$  aqueous solutions with absolute temperature.

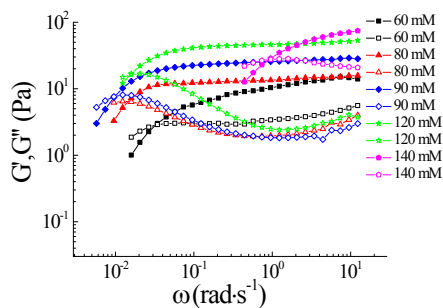

Fig. S3  $G'$  (filled symbols) and  $G''$  (unfilled symbols) versus frequency for  $[C_{16}imC_9]Br$  aqueous solution in different weight fraction concentration at 55 °C.
